# Supplementary material for: Three-dimensional metal–organic frameworks (MOFs) containing substituted diimide ligands: synthesis, structures and gas sorption studies
Source: Royal Society of Chemistry journal article supplement (doi:10.1039/d4ce00332b), 2024-01-01
Supplement: d4ce00332b1.pdf [file d4ce00332b1.pdf]

## Three-dimensional metal-organic frameworks (MOFs) containing substituted diimide ligands: Synthesis, structures and gas sorption studies

Luccile Mbonzhe,<sup>a</sup> Lufuno Mushango,<sup>a</sup> Nabanita Chatterjee,<sup>b</sup> Leigh Loots,<sup>c</sup> Clive L. Oliver,<sup>b</sup> and Eustina Batisai<sup>a\*</sup>

<sup>a</sup>*Department of Chemistry, University of Venda, P Bag X5050, Thohoyandou 0950, South Africa*

<sup>b</sup>*Department of Chemistry, University of Cape Town, Rondebosch 7701, South Africa*

<sup>c</sup>*Department of Chemistry, Stellenbosch University, P Bag X1, Matieland 7602, South Africa.*

*\*Eustina.Batisai@univen.ac.za*

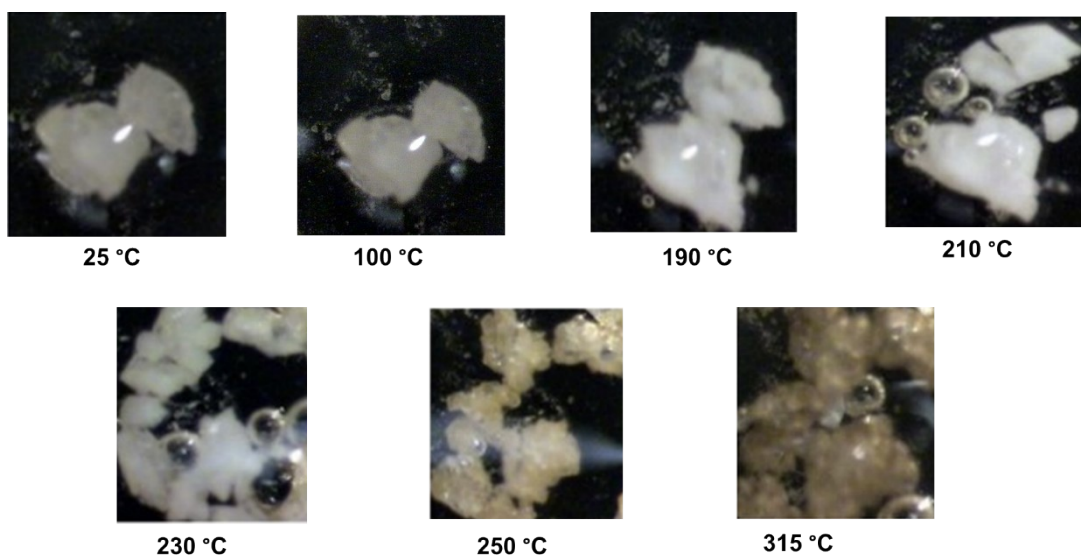

**Figure S1** HSM micrographs of crystals of **1** captured at different temperatures: (a) 25 °C, (b) 190 °C, (c) 210 °C, (d) 230 °C, (e) 250 °C and (f) 315 °C.

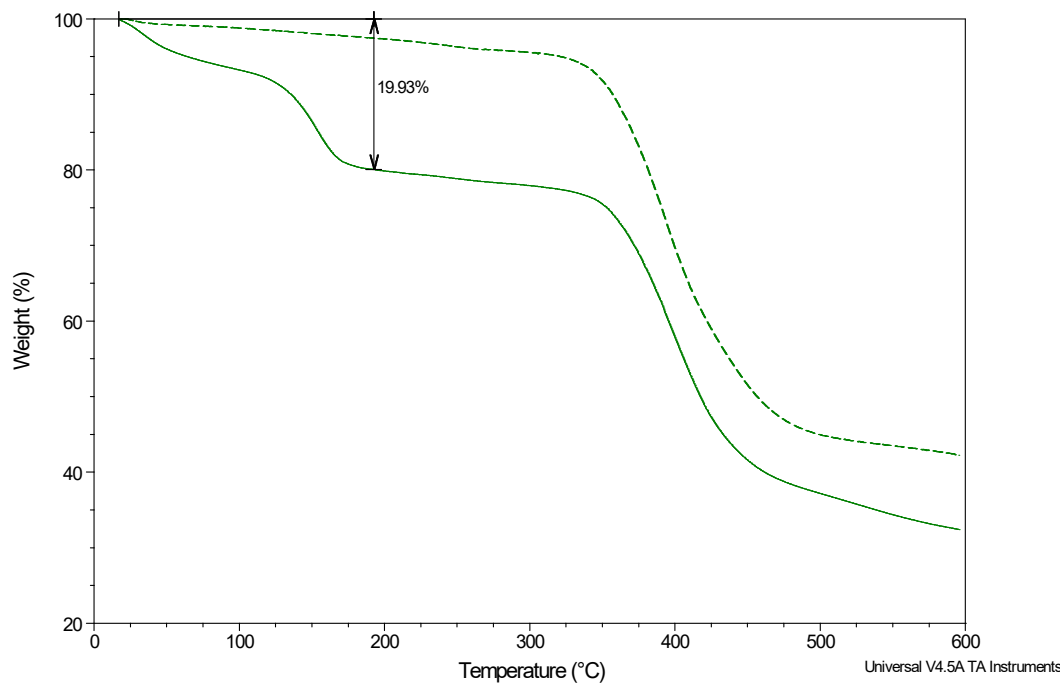

**Figure S2** TGA thermograms of **1** (solid line) and **1-d** (dashed line).

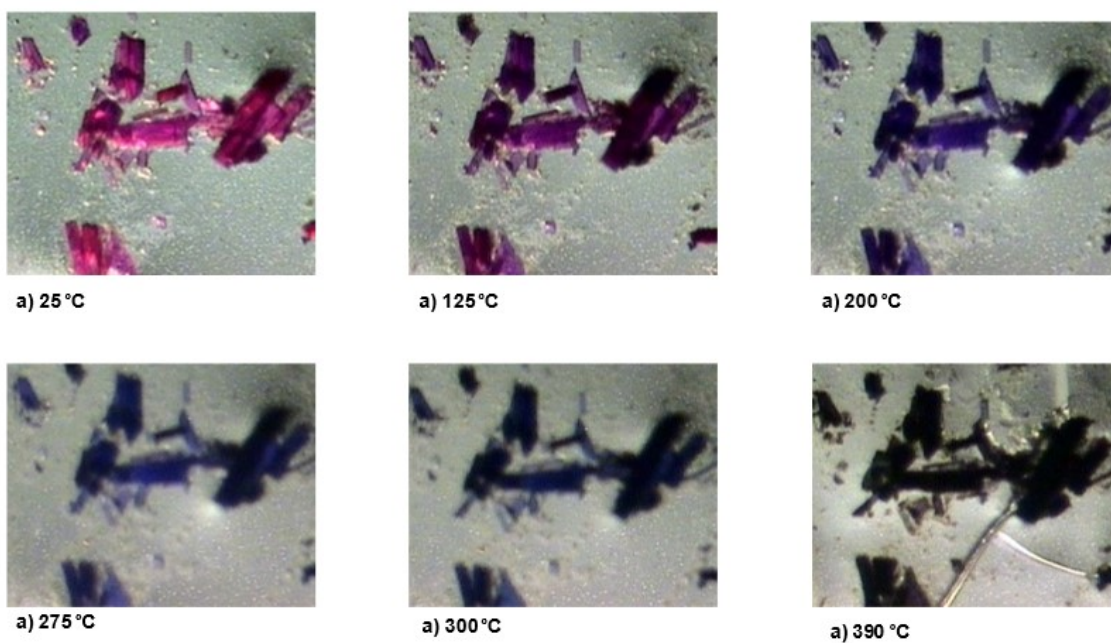

**Figure S3** HSM micrographs of **2** taken as the crystals were heated from 25 °C to 400 °C at 10 °C min<sup>-1</sup>.

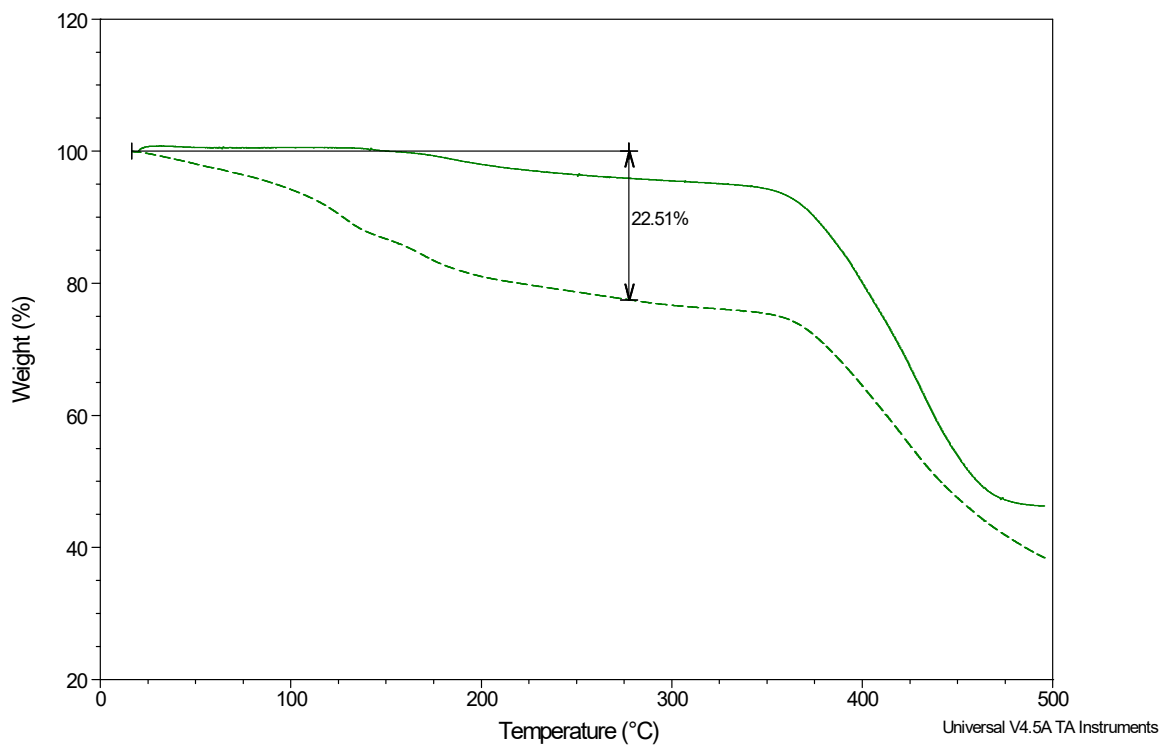

**Figure S4** TGA thermogram of **3** (dashed line) and **3d** (solid line).
